# Supplementary material
Source: Springer Nature journal article supplement (https://www.springermedizin.de/resource/supplementary/13075_2012_4386_MOESM3_ESM.pdf/10110304)

A. Intima media thickness

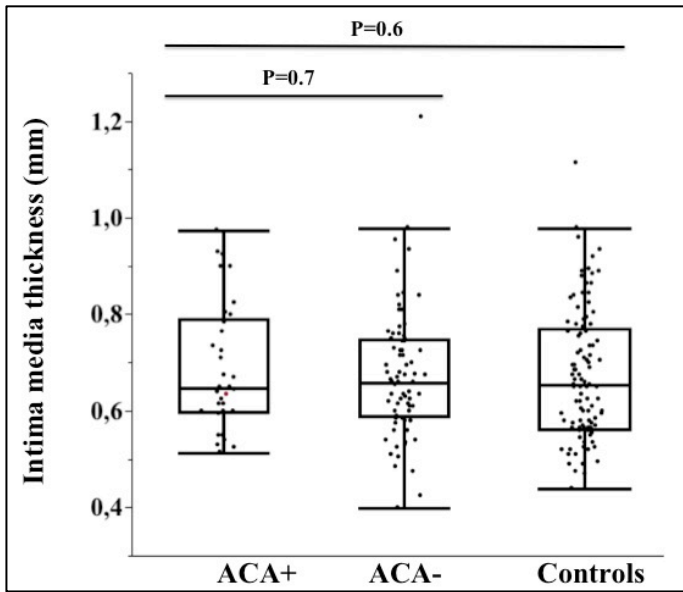

B. Ankle brachial index

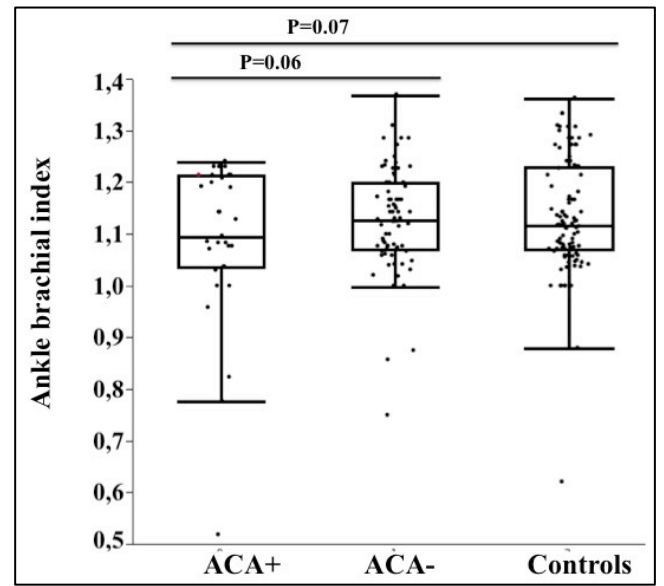

C. Frequency of Plaque

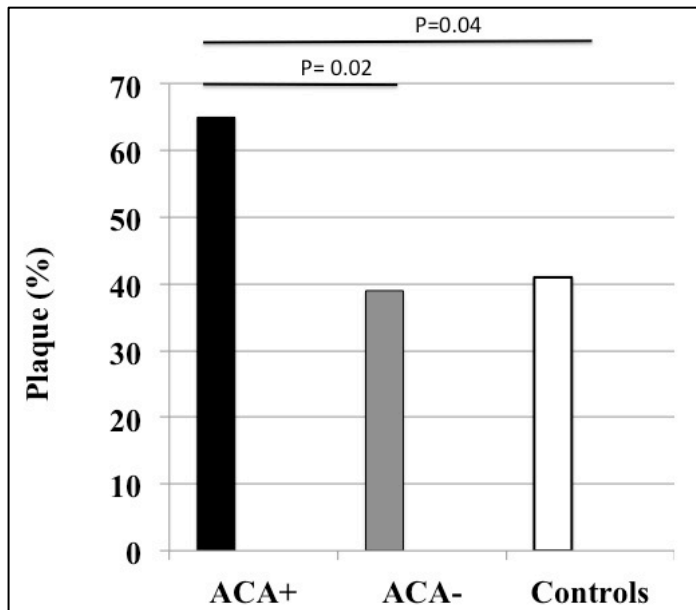

Supplement: MOESM3 [file 10110304]
